# Supplementary material for: Impairment of Lhca4, a subunit of LHCI, causes high accumulation of chlorophyll and the stay-green phenotype in rice
Source: PubMed Central journal article supplement (PMC6019047; doi:10.1093/jxb/erx468), 2018-01-03
Supplement: erx468_suppl_supplementary_figures_and_tables.pdf [file erx468_suppl_supplementary_figures_and_tables.pdf]

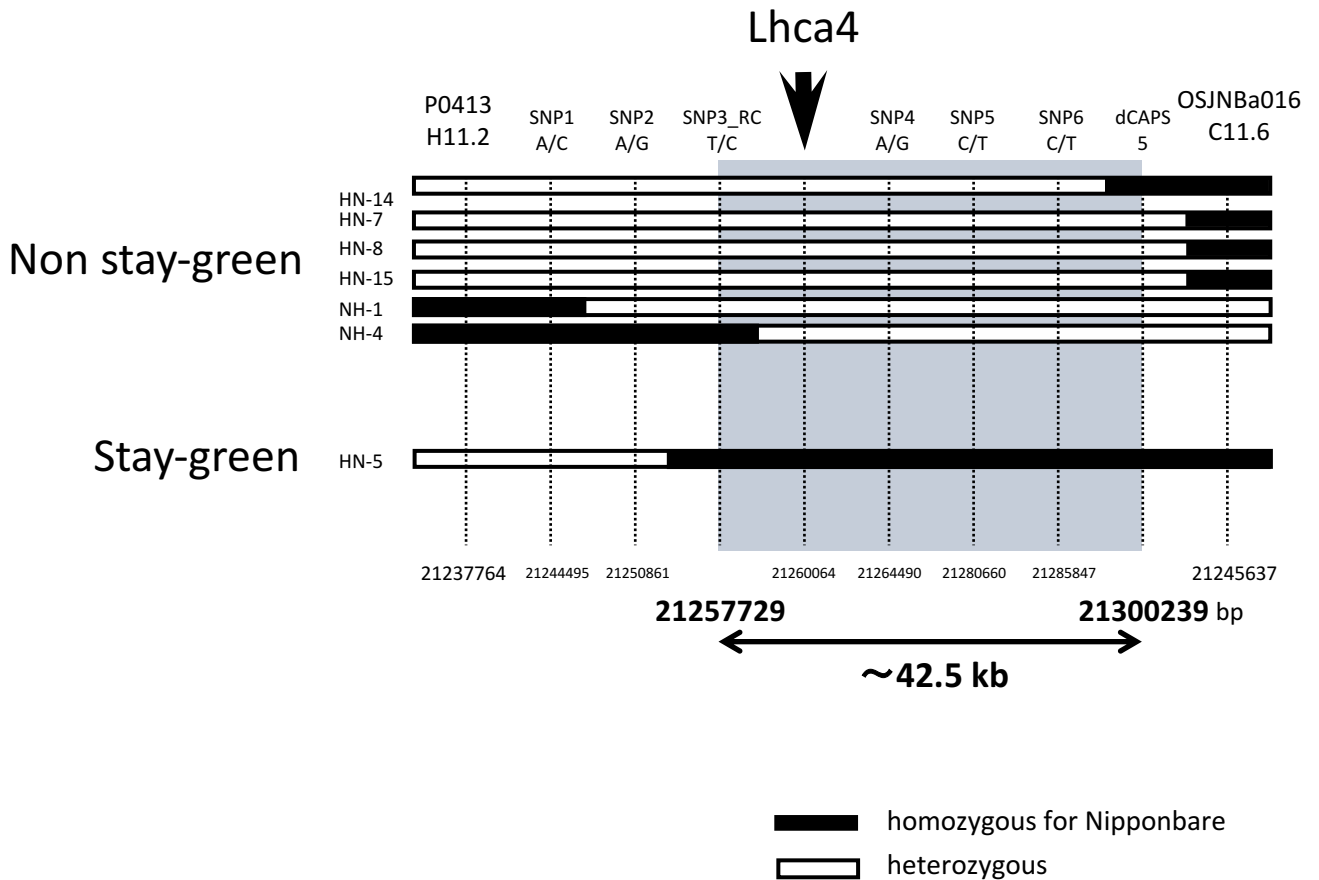

**Supplementary Fig. S1.** Genotype and phenotype of recombinant individuals in the *DYE1* candidate region. Recombinants obtained from  $F_2$  and its progeny population between *dye1-1* and the CSSL SL224 are shown. The *DYE1* candidate region delimited by these recombinants is shown in gray. SNP positions were referenced by IRGSP Releases Build 5.0.

|                |        |       |       |       |       |        |        |           |        |        |       |       |        |       |        |       |       |       |       |      |       |     |
|----------------|--------|-------|-------|-------|-------|--------|--------|-----------|--------|--------|-------|-------|--------|-------|--------|-------|-------|-------|-------|------|-------|-----|
|                |        |       | 20    |       |       | 40     |        |           | 80     |        | 80    |       |        |       |        |       |       |       |       |      |       |     |
| A.thaliana     | MATVTT | HASAS | SIFRP | CTS-K | PRFLT | GSSGR  | LNRDLS | SFTSI     | GSSAKT | SSFK   | VEAKK | GEWLP | GLASPD | YLTG  | SLAGDN | GFDP  | 79    |       |       |      |       |     |
| G.max          | MATVTT | QASAS | AIFRP | CTS-K | SRFLT | GSSGK  | LNREVT | MRPM      | GCPP-  | SASF   | VEAKK | GEWLP | GLASPT | YLNG  | TLPGDN | GFDP  | 78    |       |       |      |       |     |
| S.lycopersicum | MATVTT | QASAS | AVFPP | SAT-K | TRFLN | GSSGK  | LNRFDS | FKS-      | -STLS  | YNSFK  | VEAKK | GEWLP | GLTSPT | YLNG  | SLAGDN | GFDP  | 77    |       |       |      |       |     |
| O.sativa       | MASVT  | ARTPV | AALRS | SASLK | STFLG | QSSSTR | LAR-   | - - - - - | -APT   | TRRNVR | AEAK- | GEWLP | GLPSPT | YLNG  | SLPGDN | GFDP  | 71    |       |       |      |       |     |
|                |        |       | 100   |       |       | 120    |        |           | 140    |        | 160   |       |        |       |        |       |       |       |       |      |       |     |
| A.thaliana     | LGLAED | PENL  | KWVFV | QAE   | LVN   | GRWAML | GVAG   | MLLPE     | VFTKI  | GIIN   | VP    | EWYD  | AGKEQ  | YFASS | STLFV  | IEFIL | FHYVE | IRRWQ | 159   |      |       |     |
| G.max          | LGLAED | PENL  | RWYV  | QAE   | LVN   | GRWAML | GVAG   | MLLPE     | VFTKF  | GIIN   | AP    | QWYD  | AGKSE  | YFASS | STLFV  | IEFIL | FHYVE | IRRWQ | 158   |      |       |     |
| S.lycopersicum | LGLAED | PENL  | RWYV  | QAE   | LVN   | GRWAML | GVAG   | MLLPE     | VFTSI  | GLLN   | VP    | KWYD  | AGKSD  | YFASS | STLFV  | IEFIL | FHYVE | IRRWQ | 157   |      |       |     |
| O.sativa       | LGLAED | PENL  | RWYV  | QAE   | LVN   | GRWAML | GVAG   | MLLPE     | VLTKI  | GLID   | AP    | QWYD  | AGKAT  | YFASS | STLFV  | IEFIL | FHYVE | IRRWQ | 151   |      |       |     |
|                |        |       | 180   |       |       | 200    |        |           | 220    |        | 240   |       |        |       |        |       |       |       |       |      |       |     |
| A.thaliana     | DIKNP  | GSV   | NQ    | DP    | IFK   | QYSLP  | KGEV   | GYP       | GGI    | FNPL   | NF    | APTQ  | EAKE   | KE    | LANG   | RLAML | AFLGF | VVQHN | VTGKG | PFEN | LLQHL | 239 |
| G.max          | DIKNP  | GC    | VNQ   | DP    | IFK   | QYSLP  | PHEC   | GYP       | GSV    | FNPL   | NF    | APTL  | EAKE   | KE    | LANG   | RLAML | AFLGF | IVQHN | VTGKG | PFEN | LLQHL | 238 |
| S.lycopersicum | DIKNP  | GSV   | NQ    | DP    | IFK   | SYSLP  | PNEV   | GYP       | GGI    | FNPL   | NF    | APTL  | EAKE   | KE    | LANG   | RLAML | AFLGF | IVQHN | VTGKG | PFEN | LLQHL | 237 |
| O.sativa       | DIKNP  | GC    | VNQ   | DP    | IFK   | SYSLP  | PHEC   | GYP       | GSV    | FNPL   | NF    | EPTL  | EAKE   | KE    | LANG   | RLAML | AFLGF | LVQHN | VTQKG | PFEN | LLQHL | 231 |
|                |        |       |       |       |       |        |        |           |        |        |       |       |        |       |        |       |       |       |       |      |       |     |
| A.thaliana     | DPWHNT | I     | VQT   | FN    | - - - | 251    |        |           |        |        |       |       |        |       |        |       |       |       |       |      |       |     |
| G.max          | DPWHNT | I     | INT   | IRGY  | -     | 252    |        |           |        |        |       |       |        |       |        |       |       |       |       |      |       |     |
| S.lycopersicum | DPWHNT | I     | IQT   | FSN   | - -   | 250    |        |           |        |        |       |       |        |       |        |       |       |       |       |      |       |     |
| O.sativa       | DPWHNT | I     | IQT   | LSG   | - -   | 244    |        |           |        |        |       |       |        |       |        |       |       |       |       |      |       |     |

**Supplementary Fig. S2.** Alignment of Lhca4 proteins from different species.

Conserved amino acid residues are shaded. The substituted amino acid in *dye1-1* (E146K) and *dye1-2* (V107M) are shown with arrows.

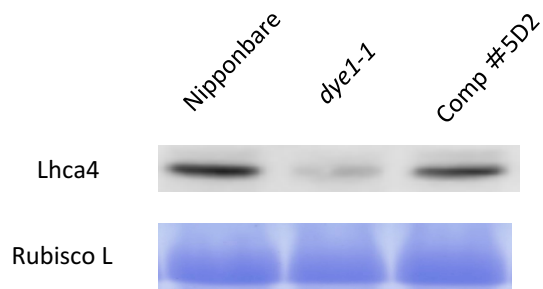

**Supplementary Fig. S3.** Western blot analysis of Lhca4 in the complementation line. Lhca4 was detected by western blot analysis in *dye1-1* and the complementation transgenic line Comp #5D2. Rubisco L was visualized by Coomassie brilliant blue G-250 staining.

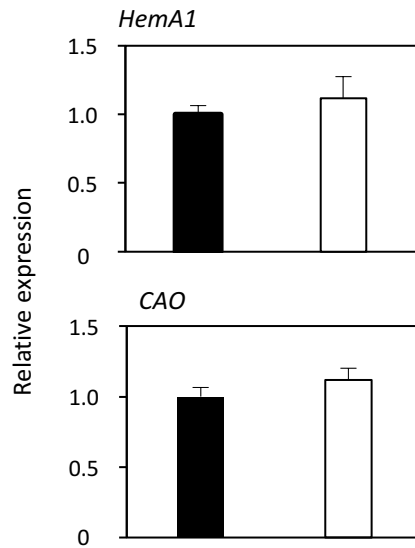

**Supplemental Figure S4.** Expression of *HemA1* and *CAO* in *dye1-1*. Quantitative RT-PCR analysis of expression of *HemA1* and *CAO* in flag leaves of 1 week before heading. Filled and open bars show Nipponbare and *dye1-1*, respectively. Thin bars indicate standard errors (n = 4).

**Supplementary Table S1.** Primers used in the quantitative RT-PCR.

| Gene         | Forward primer        | Reverse primer         |
|--------------|-----------------------|------------------------|
| Lhcb1a       | AGTAGCTGAGCTTGAAGCAG  | GAACTCGCCGGTCAGGTAG    |
| Lhcb1b       | GGAGCTCAAGGTGAAGGAGA  | GTCCCCACTTCACTTGCCG    |
| PsaA         | ATTAGCCTGGAGTCATGACG  | TTCATGAGGAAGTGGTATCTCC |
| SGR          | CGCTACTACATCTTCCGCAA  | TGGAGTGGAAAGTAGACCCACA |
| NYC3         | TCTATCTAGGTGCCAAAGGC  | ATTCTGGCACCTGCTGTTTC   |
| Os03g0327800 | AAGCGCAAGAGATCATCGGA  | CTCAGTCCCAGTGACGATCC   |
| HemA1        | GTCAAAGAAAAGTGAATCCC  | AGGATTTGCCCTTCTCCAAG   |
| CAO          | TCACGCAGAGATAGTGATGG  | AATCCATGTCGATCGGGTA    |
| actin2       | TTCCAACAGATGTGGATCTCA | GGACACCAACAATCCCAAAC   |

**Supplementary Table S2.** Information for dCAPS markers used in the positional cloning of *DYE1*

| Name            | Reverse primer                 | Reverse primer                | Restriction enzyme |
|-----------------|--------------------------------|-------------------------------|--------------------|
| P0413H11.2      | ATGCCACATGACTGAGTACTGCAGCCAAGA | TTCAGATTACATGGCGCTGC          | SacI               |
| Lhca4           | ATGTCCTGCCACCGCCGAGCT          | CAGGCGATAACGGGTTTCGAC         | SacI               |
| dCAPS_5         | GCTTGTGTCAGTTGTGT              | ATGTATGAAATAATCAAAGATAACATTA  | MseI               |
| OSJNBa0016C11.6 | TCTCCCTATCGAGATGGCGA           | TCGATCTTGACAAGGGGAGCTCCTCCTTC | XbaI               |

**Supplementary Table S3.** Analysis of photosynthetic properties of presenescent flag leaves in *dye1-1*.

|               | Chla<br>mmol /mg FwW | Chlb<br>mmol /mg FwW | Total Chl<br>mmol /mg FW | Chla/b    | Fv/Fm         | Maximum P700+<br>2/3 T sec |
|---------------|----------------------|----------------------|--------------------------|-----------|---------------|----------------------------|
| Nipponbare    | 1.85±0.09            | 0.57±0.02            | 2.42±0.11                | 3.21±0.08 | 0.82±0.001    | 9.60±2.02                  |
| <i>dye1-1</i> | 2.66±0.08 **         | 0.79±0.04 **         | 3.43±0.12 **             | 3.38±0.10 | 0.86±0.063 ** | 62.69±13.91 **             |

Flag leaves at heading were used for analysis. Maximum P700+ 2/3 T: Time to reach 2/3 of maximum P700+ (sec). n=4 for Chla, Chlb, Total Chl, Chla/b. n=5 for Maximum P700+ 2/3 T. \*\*, P<0.01 (Student's t-test)
